# Supplementary material for: Implementation of a Real-Time Medication Intake Monitoring Technology Intervention in Community Pharmacy Settings: A Mixed-Method Pilot Study
Source: MDPI journal article supplement (doi:10.3390/pharmacy9020105), 2021-05-25
Supplement: s1 [file s1]

## Supplementary Materials:

**Table S1: Interview Guide**

| Questions                                                                                                                                                                                                                                                                          | Constructs                            | Framework                   |
|------------------------------------------------------------------------------------------------------------------------------------------------------------------------------------------------------------------------------------------------------------------------------------|---------------------------------------|-----------------------------|
| What do you see as advantages/disadvantages of using the smart blister pack by your patient?<br>What did you hear back from your patient regarding the blister pack?<br>What did you see as advantage/disadvantage of access to medication adherence information for your patients | Attitude                              | Technology Acceptance Model |
| How did the use of smart blister pack affect your interaction with your patients?<br>What did people around you (other pharmacy staff) think about the smart blister pack?                                                                                                         | Subjective Norm                       |                             |
| What skills do you think you need to dispense the smart blister pack or access the portal?<br>How would you explain any planning that was required to use the system?                                                                                                              | Perceived behaviour control-Skills    |                             |
| What type of resources would you need to adopt this system in your pharmacy?                                                                                                                                                                                                       | Perceived behaviour control-Resources |                             |
| How would you explain your ability to use the system in your pharmacy?<br>What skills do you think you need to dispense the smart blister pack or access the portal?                                                                                                               | Capability- Physical                  | COM-B Model                 |
| How would you explain any planning that was required to use the system?                                                                                                                                                                                                            | Capability-Cognitive                  |                             |
| Would there be any factors that will affect your ability to offer this system for your patient in your current work environment?                                                                                                                                                   | Opportunity- Physical                 |                             |
| How did the use of smart blister pack affect your interaction with your patients?<br>How did using the new smart blister pack for your patients affected your interaction with your pharmacy staff and superiors i.e. managers?                                                    | Opportunity- Social                   |                             |

|                                                                                                                                                                                                                                                                                                                                                                                                                                                                                                                                                                                                         |                      |                                |
|---------------------------------------------------------------------------------------------------------------------------------------------------------------------------------------------------------------------------------------------------------------------------------------------------------------------------------------------------------------------------------------------------------------------------------------------------------------------------------------------------------------------------------------------------------------------------------------------------------|----------------------|--------------------------------|
| <p>What do you see as advantages/disadvantages of using the smart blister pack by your patient?</p> <p>What did you see as advantage/disadvantage of access to medication adherence information for your patients?</p> <p>Did it become easier after you start doing it?</p> <p>If you have to do this how would you plan your workload and workflow around this?</p> <p>How would you explain any support you received from organization if any?</p> <p>How did you feel when you were providing the service?</p>                                                                                      | Motivation           | Technology<br>Acceptance Model |
| <p>How did you incorporate this adherence data into your practice? Was it useful and How?</p> <p>On average how often did you check each patient's portal after giving them their blister pack?</p> <p>On average how long did it take to set up a patient with a new blister pack? Please compare this to your process for your regular non-smart blister packs.</p> <p>What was the longest time you spent looking at a single patient's profile and why?</p> <p>What was the shortest time you spend looking at a single patient's profile and why?</p> <p>Which patients did you check and why?</p> | Behaviour            |                                |
| <p>What did you find most useful about the availability of real-time drug intake data and Why?</p> <p>What did you find least useful about the availability of real-time drug intake data and Why?</p> <p>Which features of portal did you like/dislike?</p> <p>Which features of portal provided value to you?</p> <p>Which features on portal provided limited to no value?</p> <p>What did you think about the presentation of the information in the portal?</p>                                                                                                                                    | Perceived Usefulness |                                |

|                                                                                                                                                                                                                                                                                                                                                                                                                                                                                                            |                       |  |
|------------------------------------------------------------------------------------------------------------------------------------------------------------------------------------------------------------------------------------------------------------------------------------------------------------------------------------------------------------------------------------------------------------------------------------------------------------------------------------------------------------|-----------------------|--|
| <p>How was your experience with this blister pack?</p> <p>How did you like dispensing the medications in smart product?</p> <p>Please describe any problems you experienced with the product? How did you resolve those problems?</p> <p>Did you use the reminder function for yourself in addition to the patient and how did you find it?</p> <p>What did you hear back from your patients regarding the reminder?</p> <p>How did you resolve any patient concerns related to the reminder function?</p> | Perceived ease of use |  |
| <p>Would you recommend this product for your patients in the future? Why or Why not?</p>                                                                                                                                                                                                                                                                                                                                                                                                                   | Intention to use      |  |
| <p>Would there be any barriers to offer this system for your patient?</p>                                                                                                                                                                                                                                                                                                                                                                                                                                  | External factor       |  |
